# Supplementary material
Source: publisher figshare collection journal article supplement (https://rs.figshare.com/ndownloader/files/7874152)
Supplement: Supplementary file 1 [file 7874152]

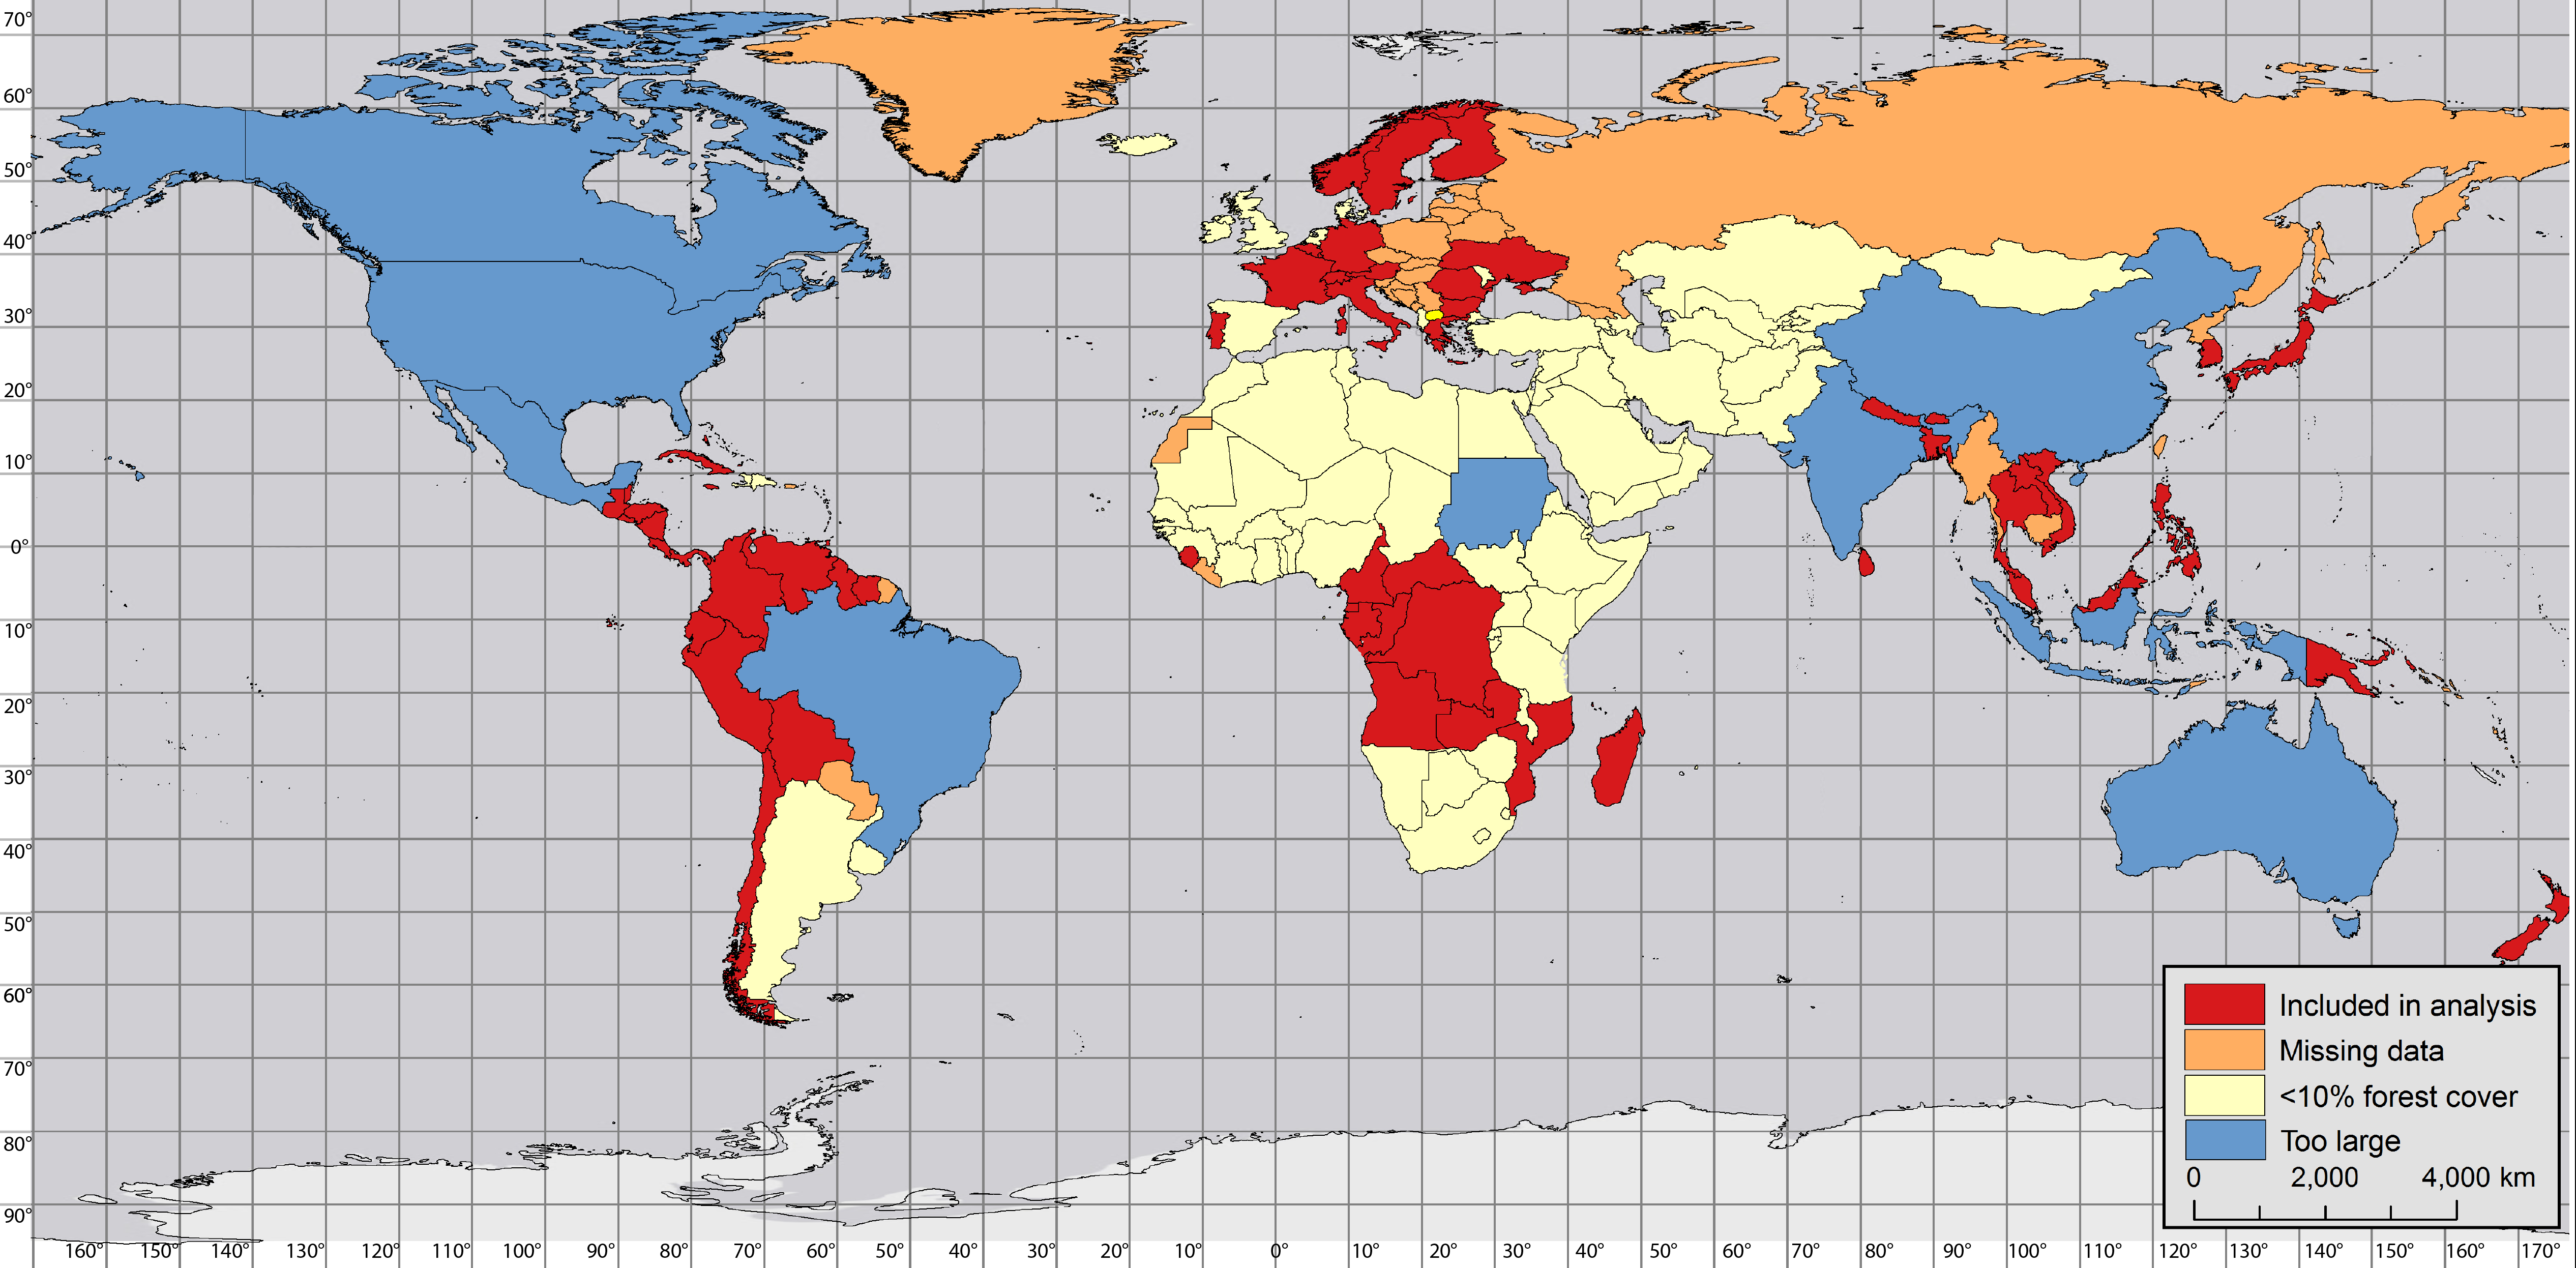


**Supplementary Material 3.** The 60 countries used in our analysis (in red). From an initial group of 192 nations, countries were excluded if: (*i*) area was greater than 1.5 million km2 or less than 625 km2 (in blue), (*ii*) less than 10% of area was forested in 1990 (according to satellite-derived metrics of forest cover, in yellow), (*iii*) population, GNI, or climate data were unavailable (in orange). Map courtesy of Maggie Klope.
